# Supplementary material for: Syntheses and structural and serum protein protecting activity of ruthenium(ii)–DMSO complexes containing a mercapto ligand
Source: Royal Society of Chemistry journal article supplement (doi:10.1039/d2nj01363k), 2022-01-01
Supplement: d2nj01363k1.zip [file d2nj01363k1.zip]

## Supporting Information

# Syntheses, Structural and Serum Protein Protecting activity of Ruthenium(II)-DMSO complexes containing mercapto ligand

Santosh Kumar Dubey<sup>a\*</sup>, Sunita<sup>a</sup>, Manoj Trivedi<sup>b\*</sup>, Shikha Gulati<sup>b</sup>, Sanjay Kumar<sup>b</sup>, Nigam P. Rath<sup>c\*</sup>, Satish Kumar<sup>a</sup>, Raman Lakia<sup>d</sup>, Neera Ragav<sup>d</sup>, Sumanjeet Kaur<sup>e</sup>

<sup>a</sup>Department of Chemistry, Institute of Integrated and Honors Studies, Kurukshetra University, Kurukshetra 136119, India

Email:santoshkdubey@kuk.ac.in

<sup>b</sup>Department of Chemistry, Sri Venkateswara College, University of Delhi, NewDelhi-110021,India.

Email:manojtri@gmail.com

<sup>c</sup>Department of Chemistry & Biochemistry and Centre for Nanoscience, University of Missouri-St. Louis, One University Boulevard, St. Louis, MO 63121-4499, USA.

Email:rathn@umsl.edu

<sup>d</sup>Department of Chemistry, Kurukshetra University, Kurukshetra-136119, India

<sup>e</sup>Department of Chemistry, SGTB Khalsa College, University of Delhi. Delhi-110 007, India

## **Content**

- 1. NMR Spectra for the complexes 1-4.**
- 2. FTIR Spectra for the complexes 1-4.**
- 3. Emission Spectra for the complexes 1-4.**

# NMR data for compounds

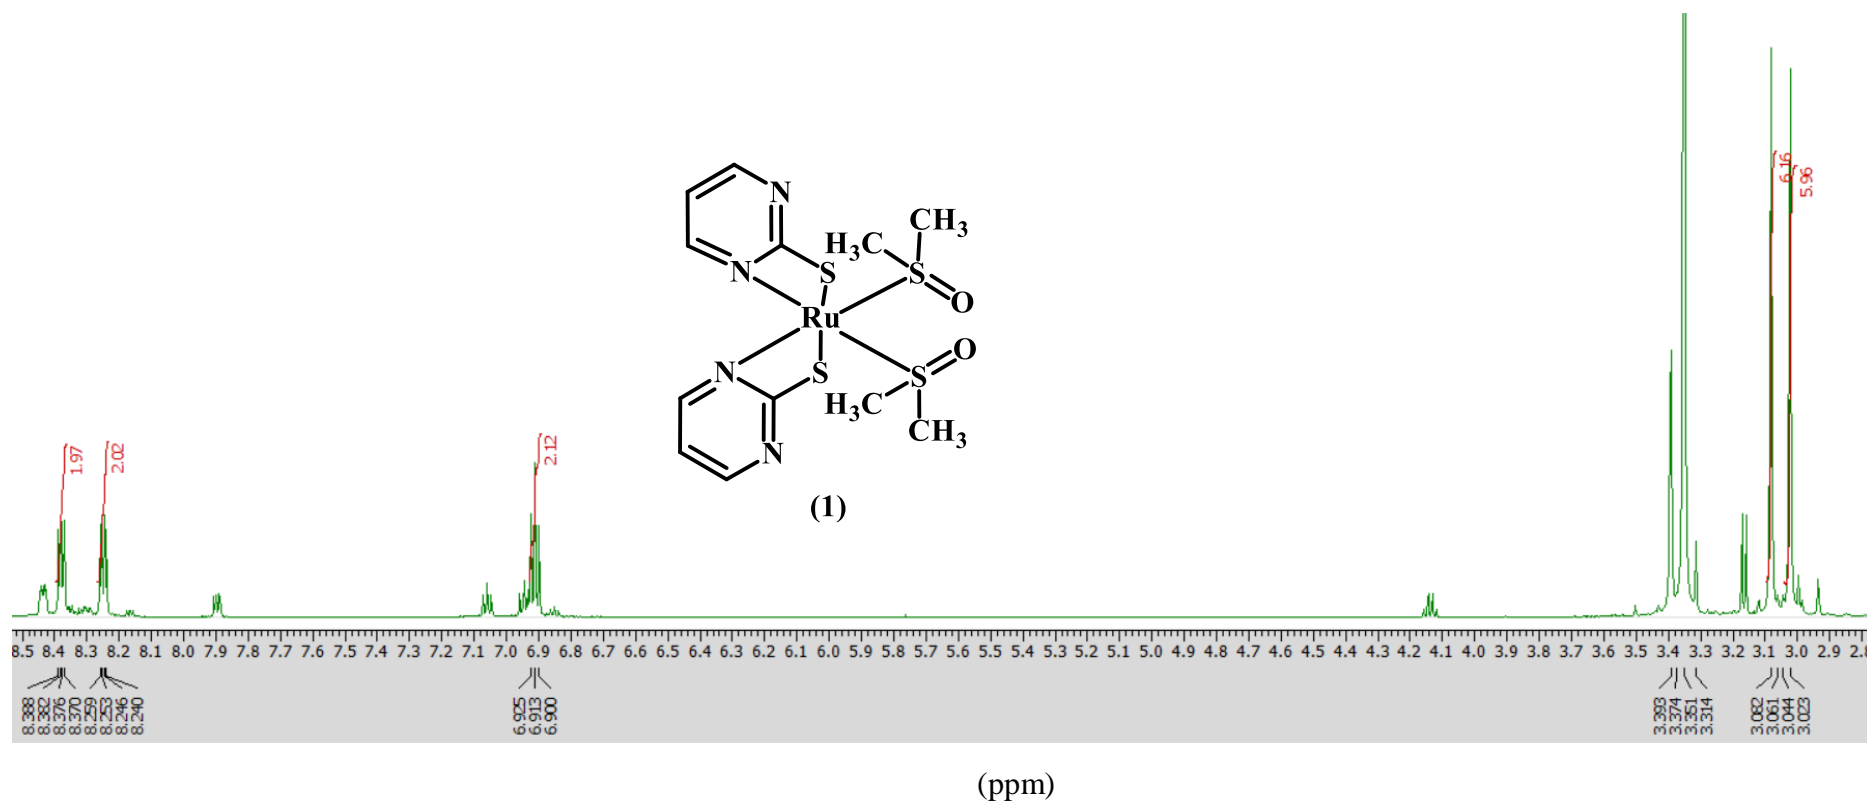

**Figure S1.**  $^1\text{H}$  NMR spectrum of  $[\text{Ru}(\text{mpt})_2(\text{dmsol})_2]$  (**1**) in  $\text{DMSO}-d_6$  at 298K.

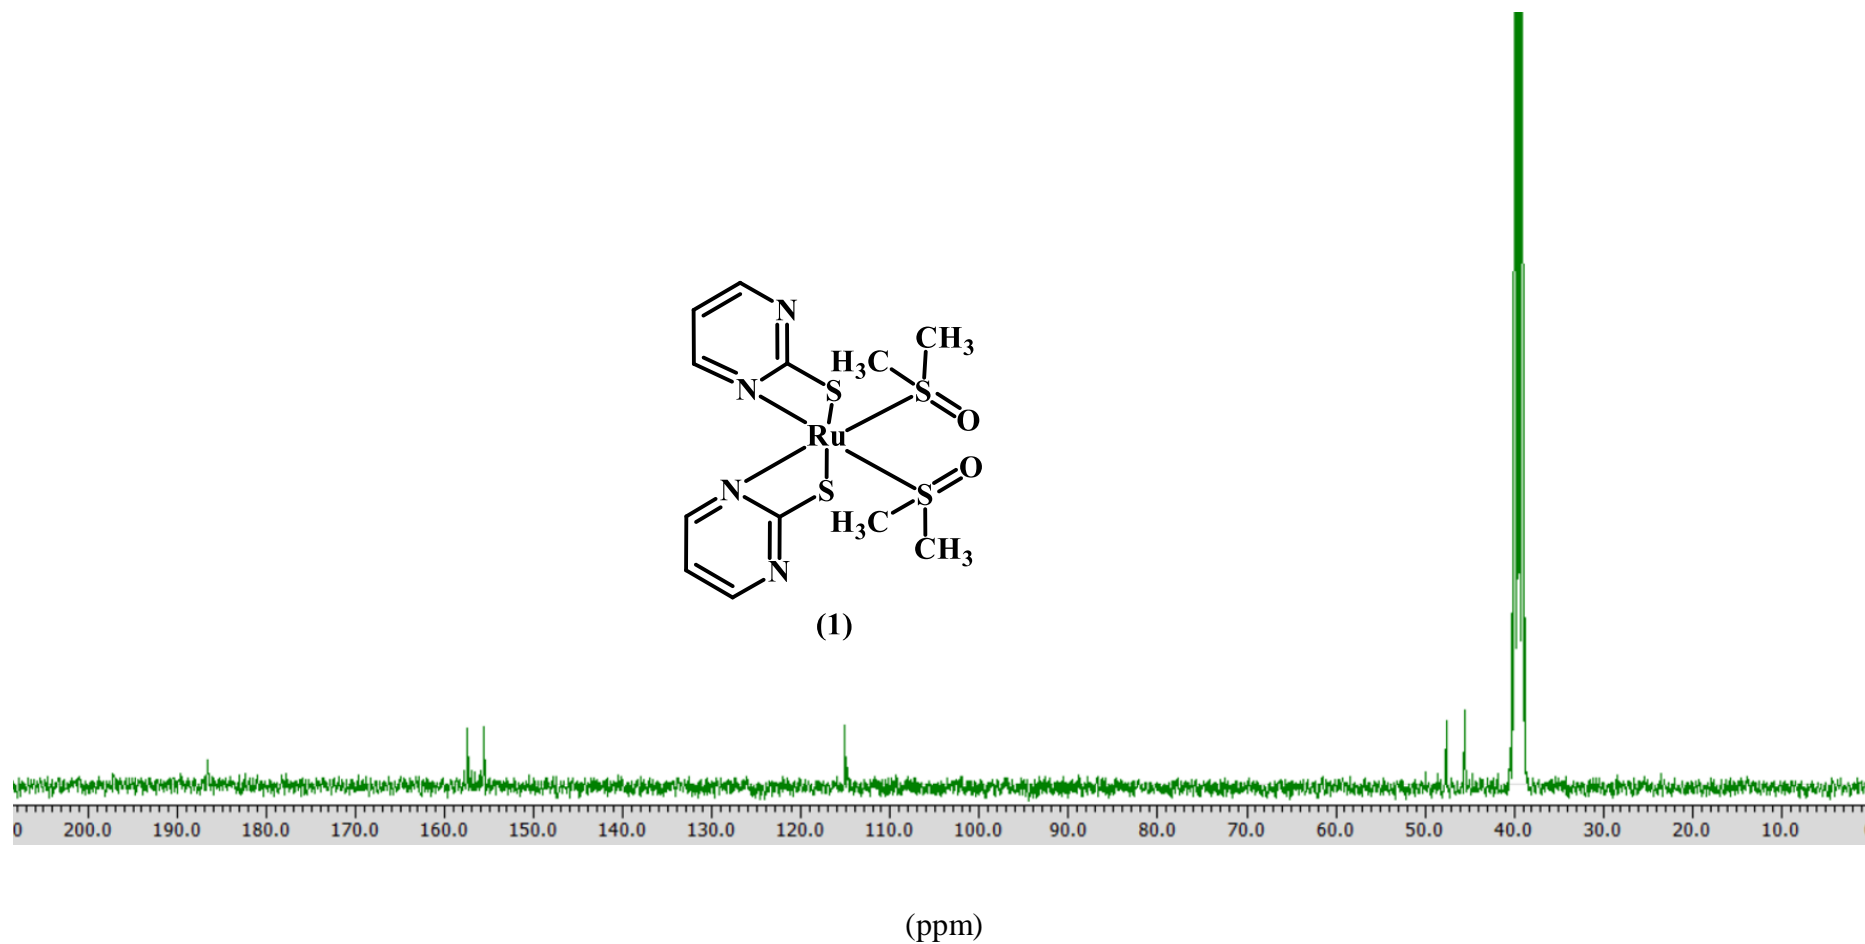

**Figure S2.**  $^{13}\text{C}$   $\{^1\text{H}\}$  NMR spectrum of  $[\text{Ru}(\text{mpt})_2(\text{dms})_2]$  (**1**) in  $\text{DMSO}-d_6$  at 298K.

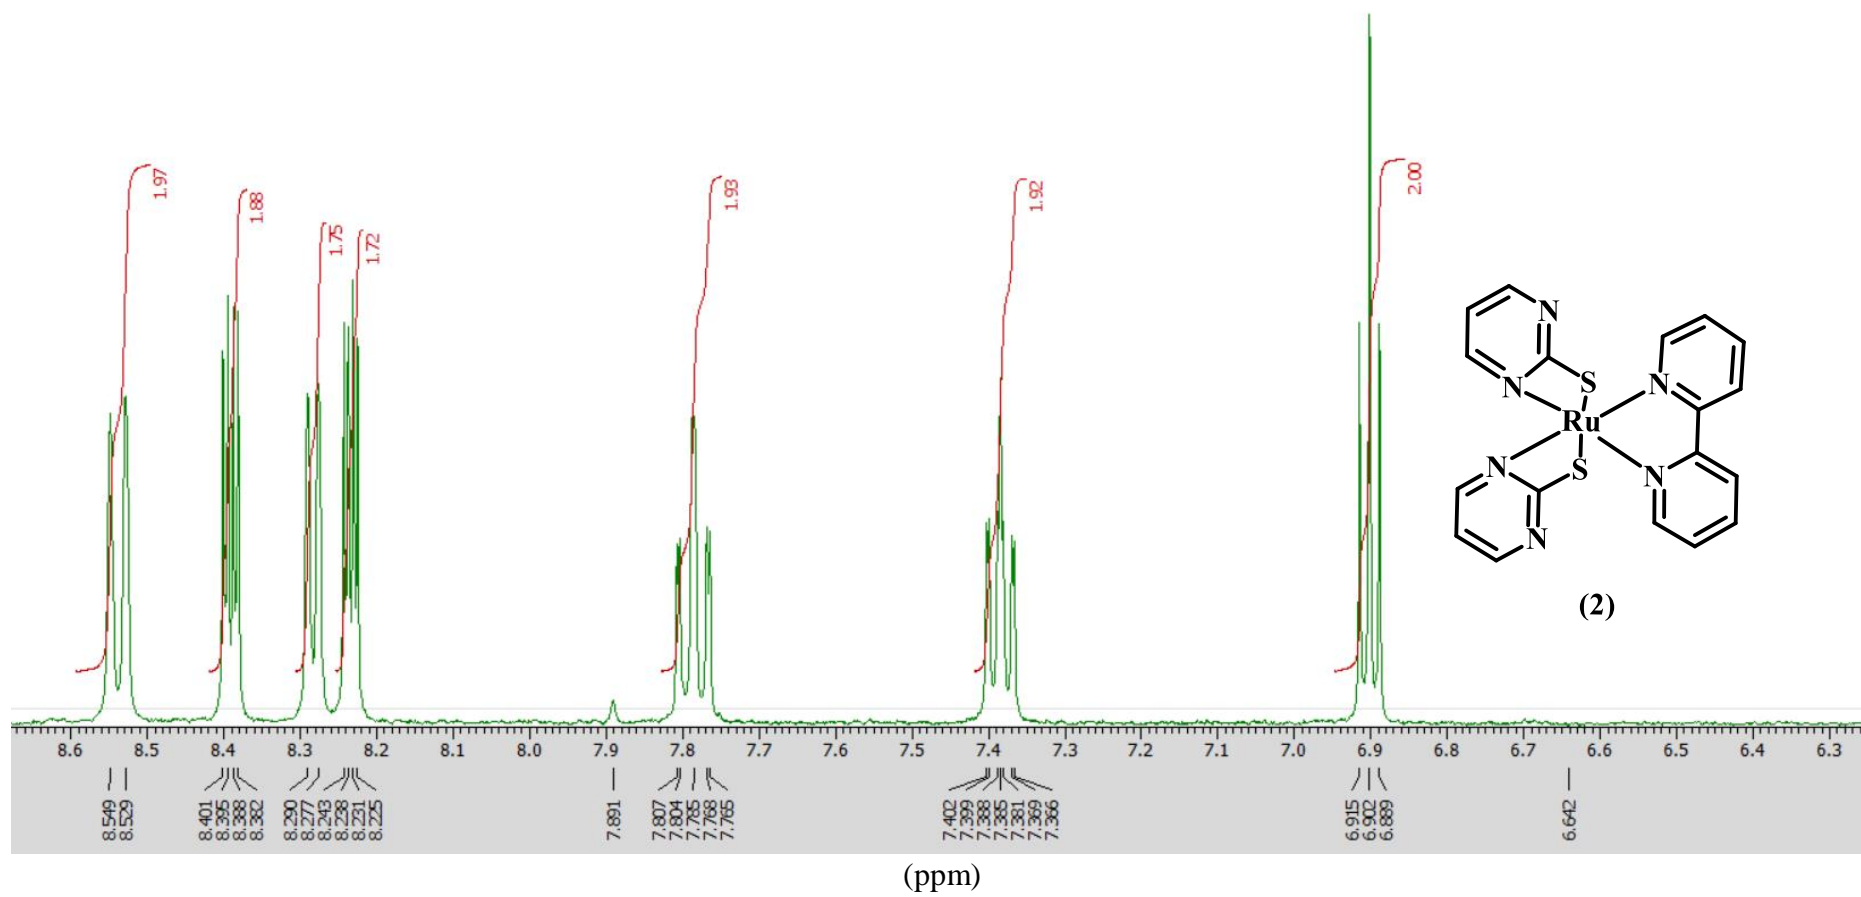

**Figure S3.**  $^1\text{H}$  NMR spectrum of  $[\text{Ru}(\text{mpt})_2(\text{bpy})]$  (2) in  $\text{DMSO}-d_6$  at 298K.

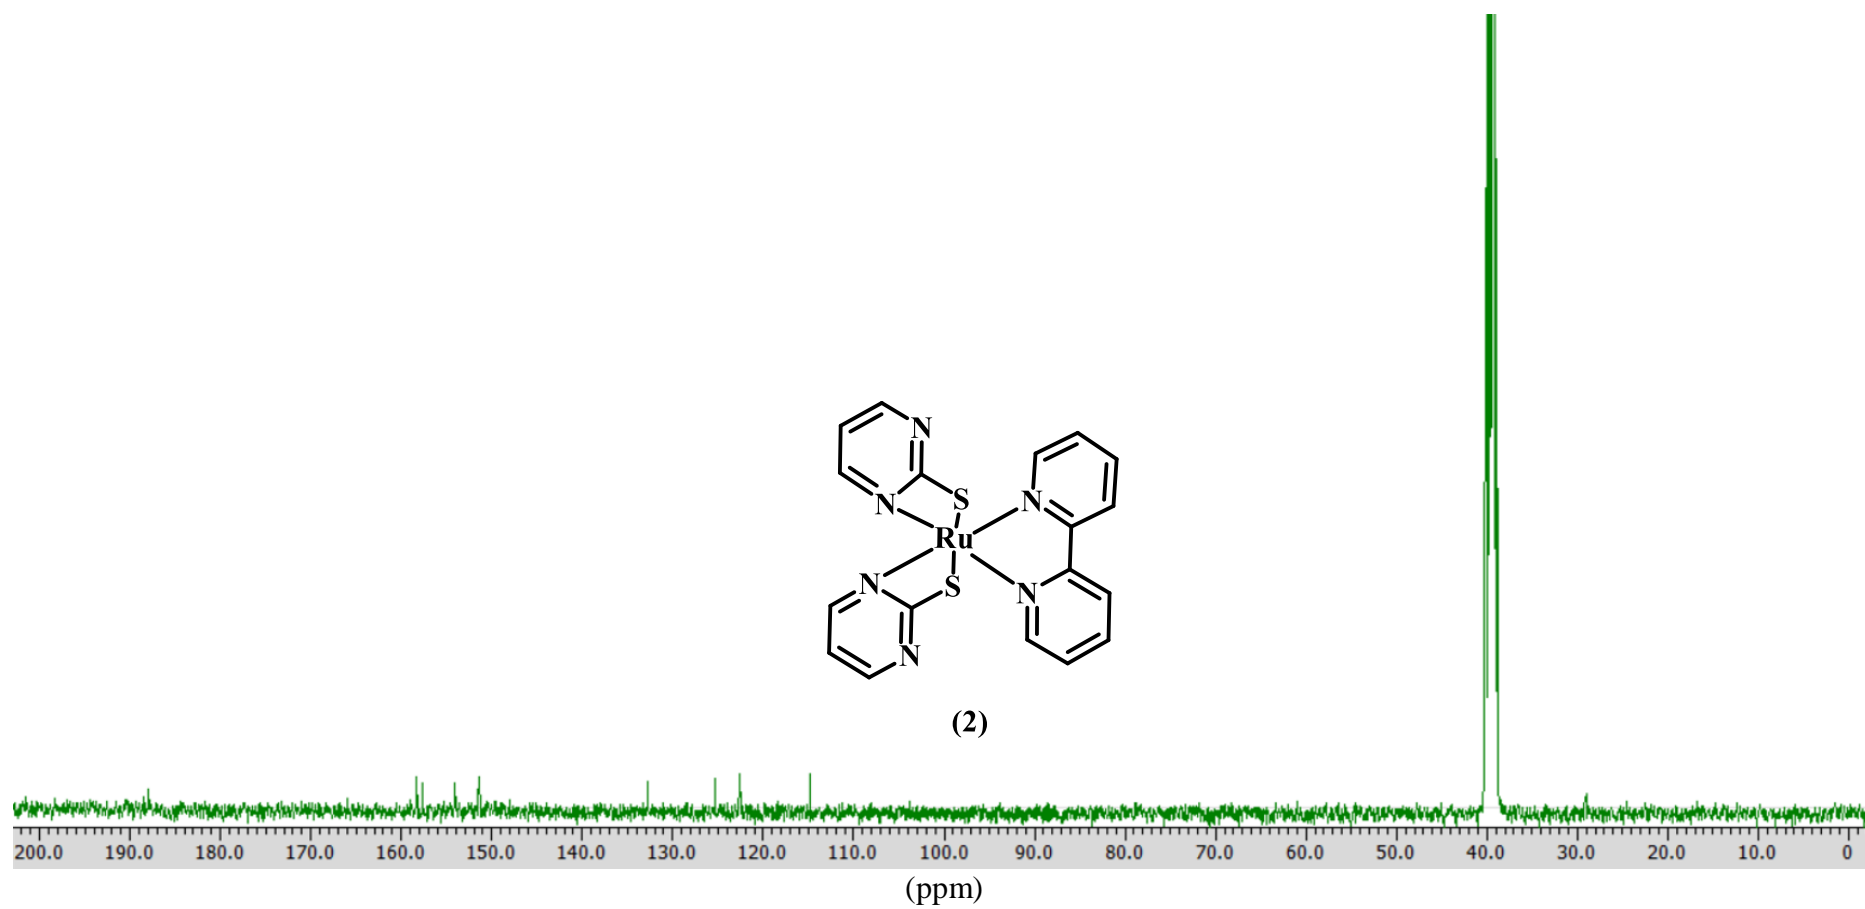

**Figure S4.**  $^{13}\text{C}$   $\{^1\text{H}\}$  NMR spectrum of  $[\text{Ru}(\text{mpt})_2(\text{bpy})]$  (**2**) in  $\text{DMSO-}d_6$  at 298K.

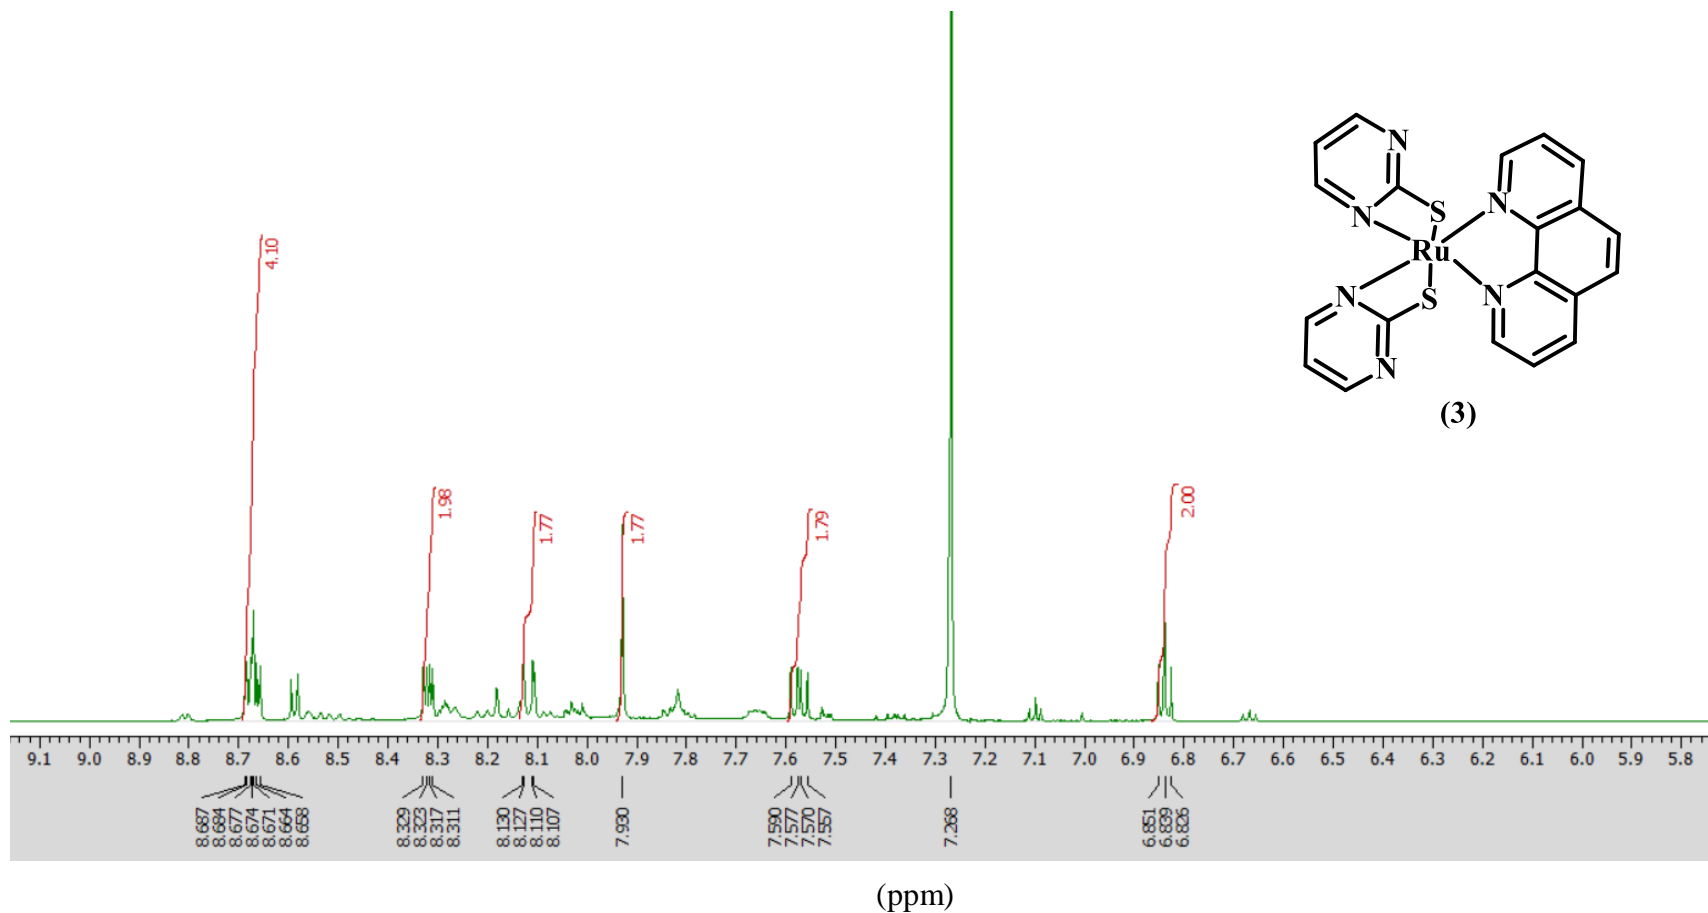

**Figure S5.**  $^1\text{H}$  NMR spectrum of  $[\text{Ru}(\text{mpt})_2(\text{Phen})]$  (3) in  $\text{CDCl}_3$  at 298K.

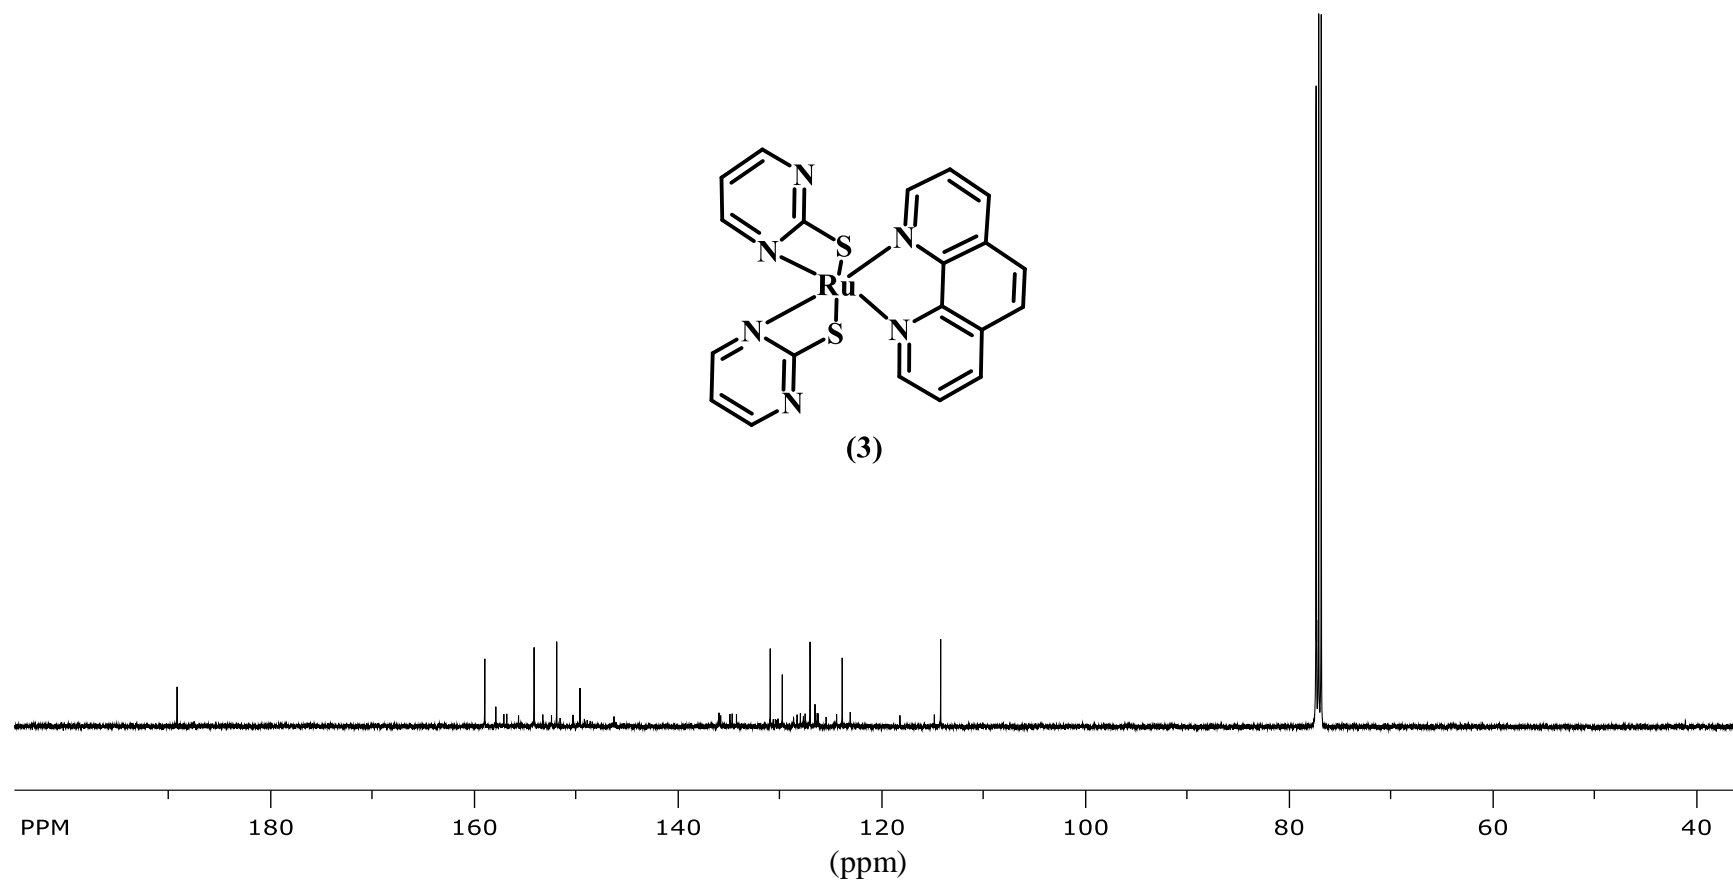

**Figure S6.** <sup>13</sup>C {<sup>1</sup>H} NMR spectrum of [Ru(mpt)<sub>2</sub>(Phen)] (3) in CDCl<sub>3</sub> at 298K.



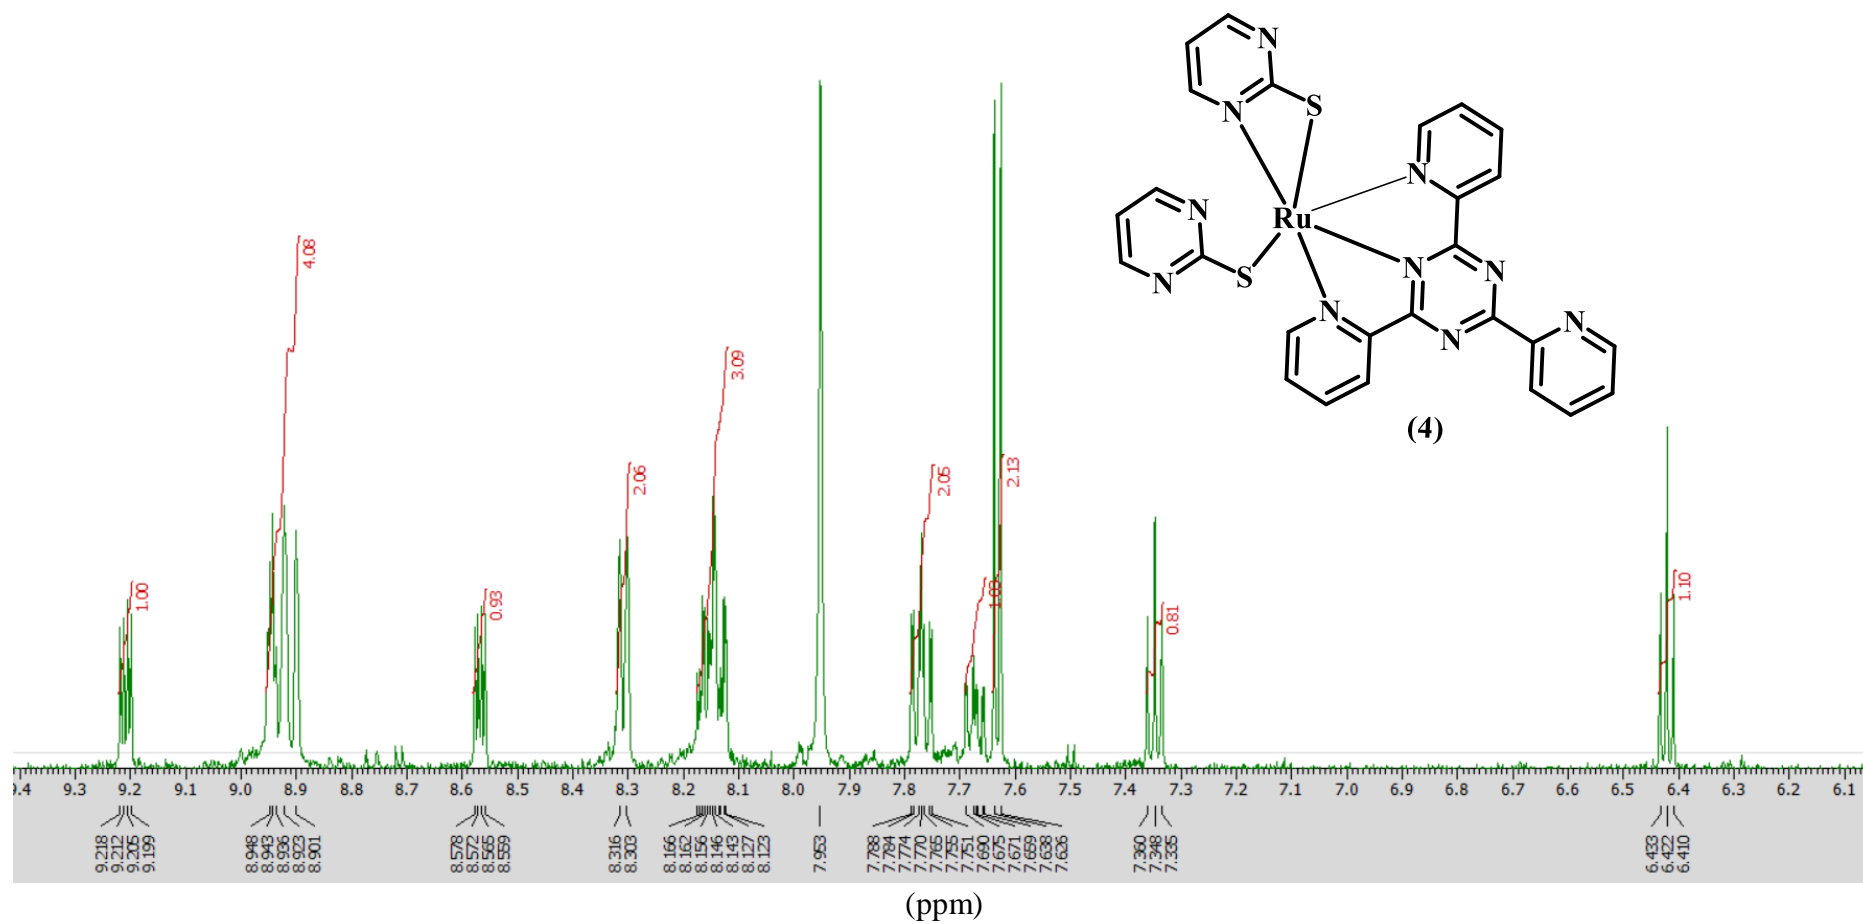

**Figure S7.**  $^1\text{H}$  NMR spectrum of  $[\text{Ru}(\text{mpt})_2(\text{tptz})]$  (4) in  $\text{CDCl}_3$  at 298K.

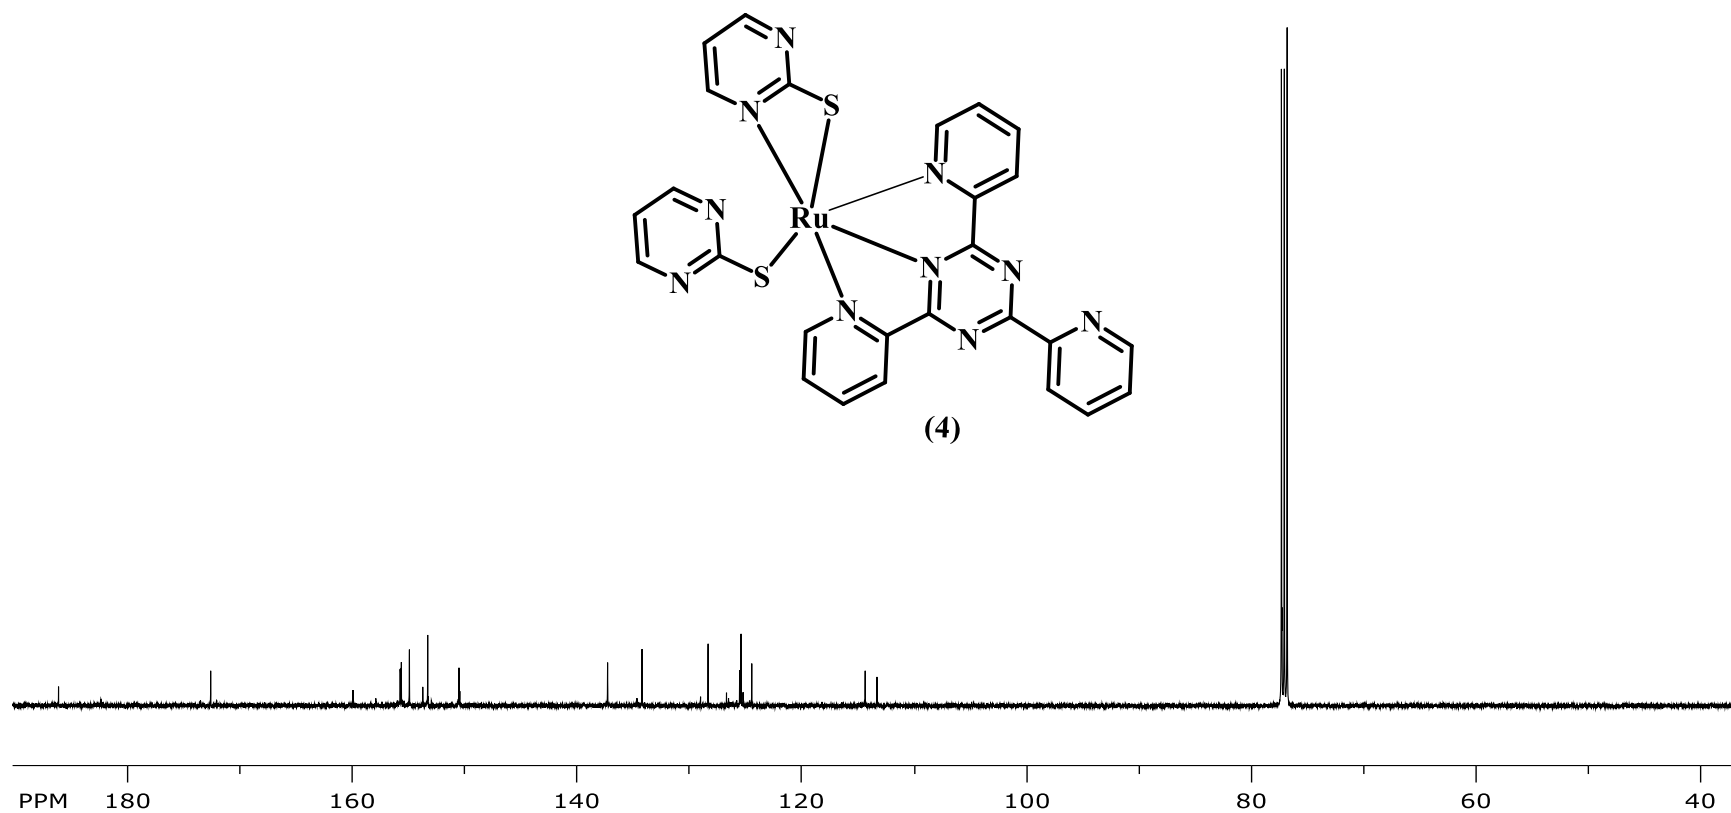

**Figure S8.** <sup>13</sup>C {<sup>1</sup>H} NMR spectrum of [Ru(mpt)<sub>2</sub>(tptz)] (4) in CDCl<sub>3</sub> at 298K.

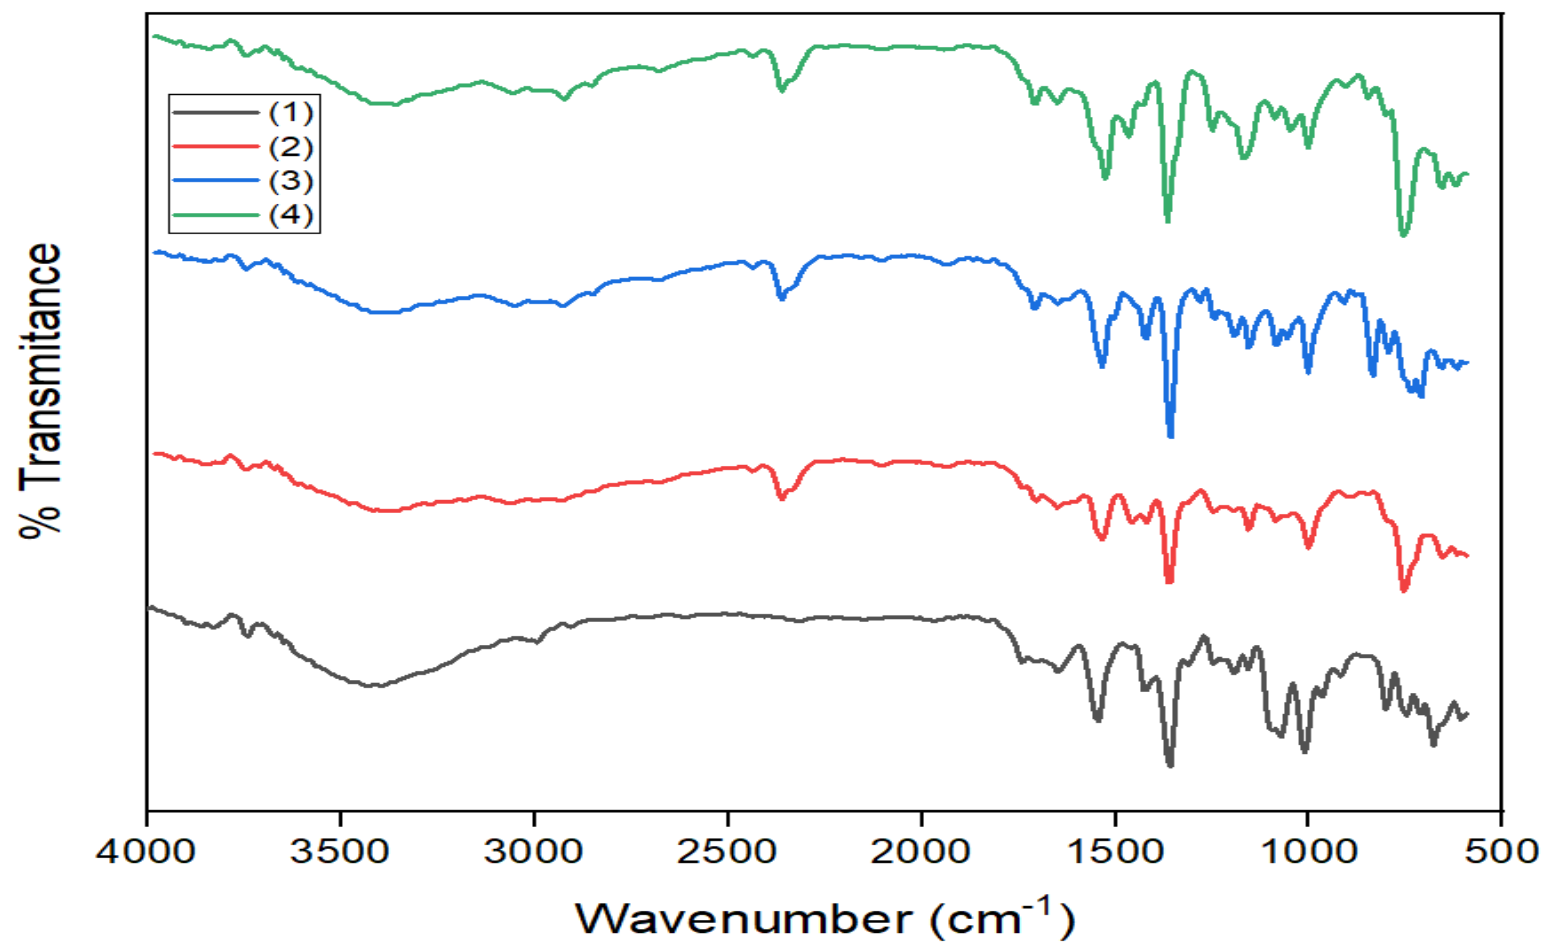

**Figure S9.** FTIR spectra of complexes **1-4**.

**Table 1.** Crystallographic data for complexes **1**, **2** and **4**.

|                                        | <b>1</b>                                                                        | <b>2</b>                                                         | <b>4</b>                                                                     |
|----------------------------------------|---------------------------------------------------------------------------------|------------------------------------------------------------------|------------------------------------------------------------------------------|
| empirical Formula                      | C <sub>12</sub> H <sub>18</sub> N <sub>4</sub> O <sub>2</sub> S <sub>4</sub> Ru | C <sub>18</sub> H <sub>14</sub> N <sub>6</sub> S <sub>2</sub> Ru | C <sub>26</sub> H <sub>18</sub> N <sub>10</sub> S <sub>2</sub> Ru [+solvent] |
| Fw                                     | 479.61                                                                          | 479.54                                                           | 635.69                                                                       |
| crystal system                         | Orthorhombic                                                                    | Monoclinic                                                       | Monoclinic                                                                   |
| space group                            | <i>Pbca</i>                                                                     | <i>P2<sub>1</sub>/c</i>                                          | <i>P2<sub>1</sub>/n</i>                                                      |
| a, Å                                   | 15.7042(2)                                                                      | 12.707(3)                                                        | 9.05910(10)                                                                  |
| b, Å                                   | 9.35780(10)                                                                     | 9.5980(19)                                                       | 16.1092(2)                                                                   |
| c, Å                                   | 25.3944(3)                                                                      | 14.964(3)                                                        | 18.9209(2)                                                                   |
| α, deg                                 | 90                                                                              | 90                                                               | 90                                                                           |
| β, deg                                 | 90                                                                              | 91.51(3)                                                         | 100.5500(10)                                                                 |
| γ, deg                                 | 90                                                                              | 90                                                               | 90                                                                           |
| V, Å <sup>3</sup>                      | 3731.88(8)                                                                      | 1824.4(7)                                                        | 2714.54(5)                                                                   |
| Z                                      | 8                                                                               | 4                                                                | 4                                                                            |
| d <sub>calc</sub> , g cm <sup>-3</sup> | 1.707                                                                           | 1.746                                                            | 1.555                                                                        |
| μ, mm <sup>-1</sup>                    | 1.299                                                                           | 1.104                                                            | 0.768                                                                        |
| T, K                                   | 566(2)                                                                          | 566(2)                                                           | 566(2)                                                                       |
| R <sub>1</sub> all                     | 0.0290                                                                          | 0.0234                                                           | 0.0378                                                                       |
| R <sub>1</sub> [I > 2σ(I)]             | 0.0233                                                                          | 0.0212                                                           | 0.0283                                                                       |
| wR <sub>2</sub>                        | 0.0571                                                                          | 0.0550                                                           | 0.0724                                                                       |
| wR <sub>2</sub> [I > 2σ(I)]            | 0.0545                                                                          | 0.0539                                                           | 0.0680                                                                       |
| GOF on F <sup>2</sup>                  | 1.043                                                                           | 1.042                                                            | 1.062                                                                        |

**Table 2.** Hydrogen bonds for **1** [Å and °].

| D-H...A                                            | d(D-H) | d(H...A) | d(D...A)  | <(DHA) |
|----------------------------------------------------|--------|----------|-----------|--------|
| C(4)-H(4)...O(1)                                   | 0.93   | 2.54     | 3.227(3)  | 130.9  |
| C(4)-H(4)...O(1)#1                                 | 0.93   | 2.60     | 3.099(3)  | 114.3  |
| C(11)-H(11A)...O(1)#1                              | 0.96   | 2.41     | 3.355(3)  | 166.9  |
| #C7-H(7)...S(2)#2                                  | 0.93   | 2.97     | 3.769(2)  | 144.4  |
| #C7-H(7)...S(1)#3                                  | 0.93   | 3.01     | 3.586(3)  | 121.5  |
| C(2)-H(2)...O(2)#4                                 | 0.93   | 2.53     | 3.264(3)  | 136.1  |
| C(9)-H(9A)...O(2)                                  | 0.96   | 2.41     | 3.148(4)  | 133.6  |
| #C9-H(9C)...S(2)                                   | 0.96   | 3.00     | 3.540(3)  | 117.3  |
| #C10-H(10B)...S(1)#5                               | 0.96   | 2.96     | 3.868(3)  | 158.8  |
| #C12 <sup>a</sup> -H(12B <sup>a</sup> )...S(1)     | 0.96   | 2.95     | 3.545(18) | 121.1  |
| C(12' <sup>b</sup> )-H(12D <sup>b</sup> )...N(4)#6 | 0.96   | 2.59     | 3.33(2)   | 133.8  |

Symmetry transformations used to generate equivalent atoms:

#1 -x+1,-y+1,-z+1   #2 x-1/2,y,-z+3/2   #3 -x+1/2,y-1/2,z

#4 x-1/2,-y+3/2,-z+1   #5 x,y-1,z   #6 -x+1,y+1/2,-z+3/2

**Table 3.** Hydrogen bonds for **2** [Å and °].

| D-H...A              | d(D-H) | d(H...A) | d(D...A) | <(DHA) |
|----------------------|--------|----------|----------|--------|
| C(8)-H(8)...S(1)#1   | 0.93   | 3.00     | 3.705(2) | 133.6  |
| C(8)-H(8)...N(4)#1   | 0.93   | 2.58     | 3.388(3) | 146.1  |
| C(9)-H(9)...N(3)     | 0.93   | 2.63     | 3.161(3) | 117.2  |
| C(10)-H(10)...N(4)#2 | 0.93   | 2.65     | 3.486(3) | 149.2  |
| C(17)-H(17)...S(2)#3 | 0.93   | 2.85     | 3.616(2) | 139.8  |
| C(18)-H(18)...N(5)   | 0.93   | 2.69     | 3.187(3) | 114.6  |

Symmetry transformations used to generate equivalent atoms:

#1 -x+1,y+1/2,-z+3/2   #2 -x+1,y-1/2,-z+3/2   #3 -x+2,y+1/2,-z+3/2
